1 **KOPTIC: A novel approach for *in silico* prediction of enzyme kinetics and regulation**

2

3 Wheaton L. Schroeder<sup>1</sup> and Rajib Saha<sup>1\*</sup>

4

5 <sup>1</sup>Department of Chemical and Biomolecular Engineering, University of Nebraska, Lincoln, NE  
6 68588

7

8 Wheaton L. Schroeder

9 University of Nebraska-Lincoln

10 Department of Chemical and Biomolecular Engineering

11 209.1 Othmer Hall

12 Lincoln, NE 68588

13 email: wheaton@huskers.unl.edu

14

15 \*Corresponding Author

16 Rajib Saha

17 University of Nebraska-Lincoln

18 Department of Chemical and Biomolecular Engineering

19 213 Othmer Hall

20 Lincoln, NE 68588

21 Email: rsaha2@unl.edu

22 **Abstract.** Kinetic models of metabolism (kMMs) provide not only a more accurate method for  
23 designing novel biological systems but also characterization of system regulations; however, the  
24 multi-‘omics’ data required is prohibitive to their development and widespread use. Here, we  
25 introduce a new approach named **K**inetic **O**PTimization using **I**nteger **C**onditions (**KO**PTIC),  
26 which can circumvent the ‘omics’ data requirement and semi-automate kMM construction using  
27 *in silico* reaction flux data and metabolite concentration estimates derived from a metabolic  
28 network model to return plausible reaction mechanisms, regulations, and kinetic parameters  
29 (defined as ‘reactomics’) using an optimization-based approach. As a benchmark for the  
30 performance of KOPTIC, a previously published, four-tissue (leaf, root, seed, and stem) metabolic  
31 model of *Arabidopsis thaliana* was used, consisting of major primary carbon metabolism  
32 pathways, named p-ath780 (1015 reactions, 901 metabolites, and 780 genes). Data required for  
33 KOPTIC was derived from an Arabidopsis’ lifecycle of 61 days. Nine separate regulator restriction  
34 sets (allowing multiple solutions) defining KOPTIC runs hypothesized 3577 total regulatory  
35 interactions involving metabolic, allosteric, and transcriptional regulatory mechanisms (with  
36 nearly 40 verified by existing literature) with a median fit error of 13.44%. Flux rates of most  
37 KOPTIC fits were found to be significantly correlated with (93.6% with  $p < 0.05$ ) and  
38 approximately 1:1 ( $r = 0.775$ ,  $p \ll 0.001$ ) to the input time-series data. Thus, KOPTIC can  
39 hypothesize maps the regulatory landscape for a specific reaction, out of which the most relevant  
40 regulatory interaction(s) can be defined by the desired growth/stress conditions or the desired  
41 genetic interventions for use in the creation of kMMs.

42

43 **Keywords.** Metabolic Modeling, Systems Biology, Kinetic Models of Metabolism

44 The use of synthetic biology for the engineering of uni- and multi-cellular organisms to enhance  
45 desirable phenotypes in microbe, plant, and animal systems, is well established and is capable of  
46 affecting the lives of millions of individuals, such as in the case of artemisinin production in yeast  
47 or enhancing nutritional value of agricultural products [1][2]. Synthetic biology techniques have  
48 been applied to many plant systems such as tomatoes [3], rice [4], and maize [5] to produce  
49 enhanced phenotypes often with application to human nutrition [2], pest resistance [5], and  
50 resilience to abiotic stresses [6]. Many of these efforts focus on a genetic understanding and  
51 manipulation of the plant system (or plant tissue) in question, relying on intuitive interventions  
52 such as changes in regulation, insertion of new gene(s), and deletion of gene(s) from competing  
53 pathway(s) [2][5][6]. Alternatively, computational approaches based on stoichiometric genome-  
54 scale models (GSMs) of metabolism can be used to predict non-intuitive genetic interventions [7]  
55 by accounting for gene-protein-reaction (GPR) links, but also understand how a gene knockout, or  
56 a change in gene regulation, can affect the entire system through tools such as Flux Balance  
57 Analysis (FBA) [8], OptKnock [9], and OptForce [10]. Hence, these tools were reported to lead to  
58 enhanced mechanistic understanding for exploring the system-wide effects of genetic interventions  
59 especially in a microbial or a fungal system, such as *E. coli* [10], cyanobacteria [11], and yeast  
60 [12] as well as various plant species such as Arabidopsis [13][14], maize [15], sorghum [16],  
61 sugarcane [16], rapeseed [16], and rice [17].

62  
63 Stoichiometric models are simpler (compared to kinetic models) steady-state representations of  
64 cellular metabolism and are widely used, since microbial cellular factories are often operated  
65 assuming a pseudo-steady state. This is a reasonable assumption since the time scale of metabolic  
66 reactions (fractions of seconds) is much quicker than other biological processes (such as  
67 transcription and translation which are on the order of minutes) [18]. Genetic interventions gained  
68 from stoichiometric modeling, while successful in many microbial applications, sometimes fail  
69 due to limitations of not incorporating reaction mechanisms, associated regulation, and enzyme  
70 metabolite concentrations [8][19]. Kinetic models of metabolism (kMMs) make up for the  
71 shortcomings of stoichiometric models at the expense of increased computational cost and ‘omics’  
72 knowledge/data requirements. While kMMs should generate the same steady-state reaction fluxes  
73 as stoichiometric models, they are also able to model unsteady-state operation [18]. The ‘omics’  
74 knowledge requirement includes transcriptomics, proteomics, and metabolomics to create accurate  
75 kMMs. If sufficient ‘omics’ data is available, deterministic or simulation-based kinetic modeling  
76 methods may be used, which while potentially accurate, form a system of stiff ordinary differential  
77 equations and require reasonable *in vivo*-relevant estimates for all kinetic parameters [7]. Another  
78 approach is Jacobian-based modeling, which makes local linear approximations of the kinetic  
79 system and can be used to calculate the time-scale of reactions and model stability from the  
80 eigenvalues of the Jacobian matrix. However, Jacobian-based modeling is more computationally  
81 complex than deterministic and simulation-based models and relies on some, if not all, *in vivo*  
82 kinetic parameters being known, in addition to knowledge of reaction mechanisms [7]. Since *in*  
83 *vivo* kinetic parameters are difficult to measure, Monte Carlo simulation-based modeling  
84 (particularly ensemble modeling), which estimates kinetic parameters, has become popular for the  
85 development of kMMs for prokaryotic organisms [7][18][19][20][21]. In this method, each  
86 reaction is decomposed to its elementary mass action steps, and then Monte Carlo simulation is  
87 used to produce a large number (ensemble) of kinetic parameter sets. These sets are pruned by  
88 training data sets until the best kinetic parameter estimate set is selected. Furthermore, no *in vivo*  
89 kinetic parameters are required *a priori* [19][20]. Despite this advantage, Monte Carlo methods

90 are limited since the reaction mechanisms including the modes of regulations must be known [7]  
91 or *in vivo* mutant flux data must be available to verify hypothesized regulation [22].

92  
93 It is this limitation (*a priori* knowledge or *in vivo* reaction flux data) which this current work seeks  
94 to address with an optimization-based tool capable of addressing the lack of *in vivo* knowledge of  
95 reaction mechanisms, regulations, and kinetic parameters, collectively hereafter defined as  
96 ‘reactomics’, which serve as a barrier to kMMs development for many species. This tool  
97 introduces a new approach for developing kMMs which is based on the use of stoichiometric  
98 models of metabolism, called Kinetic OPTimization using Integer Conditions, KOPTIC. As proof  
99 of validity of the underlying concept, KOPTIC is applied to a stoichiometric model of *Arabidopsis*  
100 *thaliana*, hereafter Arabidopsis, which was reconstructed in our recent study [23] as a model plant  
101 [13] and a higher order biological system. Although Arabidopsis has the necessary ‘omics’ data to  
102 create a small core-metabolism kinetic model, this biological system is chosen because its  
103 metabolic regulation is well-studied, allowing ‘reactomic’ predictions made by KOPTIC to be  
104 verified. The KOPTIC approach, illustrated in Figure 1, uses Mixed Integer Non-Linear  
105 Programming (MINLP) and the data from the 61 time-points (described previously) to predict  
106 Arabidopsis ‘reactomics’. By circumventing the *in vivo* data requirements and automating kinetic  
107 model generation, KOPTIC can be used for rapid development of kMMs for poorly-studied  
108 organisms (those organisms with annotated genomes but little or no ‘reactomics’ data), thus  
109 broadening the usefulness of kMMs.

110  
111 In the current work, a core stoichiometric metabolic model of Arabidopsis which was  
112 reconstructed in our recent study [23], consisting of major primary carbon metabolism pathways  
113 was used as the basis for the application of KOPTIC. This multi-tissue Arabidopsis stoichiometric  
114 model, referred to as p-ath780 has 1033 total (and 633 unique) reactions (R), 157 total (and 325  
115 unique) metabolites (M), and 780 genes (G). The model p-ath780 consists of four tissue-level  
116 models of metabolism: leaf (R: 537, M: 479, and G: 703), root (R: 130, M: 126, and G: 250), seed  
117 (R: 428, M: 411, and G: 529), and stem (R: 160, M: 140, and G: 250) [23]. The tissues were linked  
118 and their respective environmental interactions described by a Flux Balance Analysis (FBA)-based  
119 [8][23] optimization framework [24][23]. These four tissues represent the core plant system with  
120 their essential metabolic roles: the root for nutrient uptake; the leaf for photosynthesis; the seed  
121 for metabolite storage and high metabolic investment; and the stem for metabolic transport, thus  
122 logically connecting these tissues. The optimization framework makes use of biologically relevant  
123 constraints on respiration, growth, photosynthesis, maintenance, senescence, and tissue ratios  
124 [25][26][27][28][29][30] in order to simulate flux values at each hour across the selected 61 day  
125 Arabidopsis lifecycle by using the p-ath780 model.

126  
127 KOPTIC predicts ‘reactomics’ of each reaction using reaction type information from the  
128 stoichiometric model, such as specific number of substrates (single or dual) and reversibility  
129 (reversible or irreversible) and assumes three possible metabolite regulatory mechanisms for each  
130 reaction type: activation, inhibition, or no regulation. Kinetic equations derived for each reaction  
131 type combined with each metabolite regulatory mechanism, a total of 12 kinetic equation forms  
132 (see Supplemental File 1 for derivation of these equation forms), were then used by KOPTIC to  
133 fit each reaction from p-ath780 to a single kinetic equation form. This was done by minimizing  
134 the error between previously described time-point data and reaction flux predicted for that time  
135 point by a single kinetic equation form. The optimal solution for each reaction includes a

136 ‘reactomic’ prediction as a mechanism, regulation, and kinetic parameters. To study various  
137 regulation mechanisms *in silico*, nine different regulatory restriction sets were devised and applied  
138 in nine separate KOPTIC runs. Each restriction set is a combination of one location and one  
139 identity restriction (see Table 1). These restrictions applied to metabolic regulators in separate  
140 KOPTIC runs allow for multiple ‘reactomic’ predictions for some reactions. Thus, the nine  
141 KOPTIC runs returned 3577 ‘reactomic’ predictions for the 594 reactions for which at least one  
142 solution was found. These solutions are hereafter referred as ‘fits’.

143  
144 KOPTIC fits had a median error of 13.44% and particularly had low error when the regulating  
145 metabolite was limited to the same tissue as the reaction it acted upon (see Methods for details).  
146 To verify the qualitative accuracy of KOPTIC regulatory predictions, several predictions were  
147 compared to regulatory mechanisms reported in literature. We verified metabolic regulation  
148 predictions which include the ferredoxin/thioredoxin mechanism (fit errors ranging from near 0%  
149 to 37%), inhibition of ribose-5-phosphate isomerase by water-rich conditions (fit errors of 0.11%  
150 and 2.24%), and transcriptional regulation by nutrients such as sucrose, ammonia, and phosphate  
151 (fit errors ranging from 0.7% to 20.4%). These comparisons to experimental evidences  
152 demonstrate KOPTIC’s ability to predict correct metabolic regulations in response to abiotic stress  
153 and nutrient availability. In summary, this work shows how the KOPTIC approach can be used to  
154 semi-automatically (largely automated workflow), accurately (low fitting error), and correctly  
155 (correct regulatory mechanism) predict a variety of *in vivo* ‘reactomics’ through an *in silico*  
156 workflow that requires no foreknowledge of an organism’s *in vivo* ‘reactomics’ or ‘omics’ data.

157  
158 **Kinetic OPTimization using Integer Conditions (KOPTIC)**. KOPTIC’s first fit criteria for  
159 determining the ‘reactomics’ of each reaction was the reaction type as specified by the p-ath780  
160 model based on the number of substrates (single- or dual-substrate) and reversibility of the reaction  
161 (irreversible or reversible). For each of these four reaction types, three possible metabolite  
162 regulatory mechanisms were assumed plausible: activation, competitive inhibition, or no  
163 regulation. Kinetic equations were then derived for each reaction type combined with each  
164 metabolite regulatory mechanism to yield 12 unique kinetic equation forms (see Supplemental File  
165 1 for derivation of these equation forms). KOPTIC then uses MINLP optimization to attempt to fit  
166 each reaction from p-ath780 to a single kinetic equation form by minimizing the sum of squared  
167 error between the previously described time-point data and reaction flux predicted for that time-  
168 point by a single kinetic equation form of the 12 possible. The optimal solution includes  
169 ‘reactomic’ predictions as a reaction mechanism, regulation, and kinetic parameters are returned  
170 for each reaction for which at least one optimal solution was found. For each equation form, the *in*  
171 *silico* concentration of the regulator metabolite is multiplied by one or more  $K_m(j)$  terms, which  
172 can take values ranging from  $1e^{-7}$  to  $1e^5$ , such that the magnitude of a metabolite’s *in silico*  
173 concentration is of little or no importance in determining an optimal regulator for a given reaction.  
174 Instead, the pattern of a metabolite’s *in silico* concentration compared to a given reaction’s flux  
175 rate is of importance in determining whether a metabolite is an optimal regulator. More details on  
176 the formulation and creation of KOPTIC can be found in the Methods section and in Supplemental  
177 File 1.

178  
179 To study various reaction mechanisms *in silico*, nine different regulatory restriction sets were  
180 devised and applied in nine separate KOPTIC runs. Each restriction set is a combination of one  
181 location and one identity restriction type (see Table 1). The location restriction types were same

182 compartment ('sc'), same tissue ('st'), and any tissue ('at'), while the identity restriction types  
183 were no restriction ('nr'), no proton or water regulation ('npw'), and no proton, water, or energy  
184 molecule regulation ('npwe'). These restriction sets were applied to metabolic regulators in  
185 separate KOPTIC runs in order to allow multiple 'reactomic' prediction for some reactions, to  
186 explore how regulation changes by conditions, and to study multiple regulatory mechanisms for a  
187 single reaction. In order to make 'reactomic' predictions for as many model reactions as possible  
188 in a reasonable time, each of the nine separate KOPTIC runs (distinguished by its regulatory  
189 restriction set) had ten parallel instances, each starting with a reaction 10% of the way further  
190 through the model than the previous instance (so that each instance only predicts 'reactomics' for  
191 10% of the model reactions for full coverage). The results of the ten parallel instances for each  
192 reaction set were concatenated into summaries of results for each of the nine reaction sets  
193 (Supplemental File 1) after a runtime of 168 hours (or 7 days) for each instance.

194  
195 There were three KOPTIC results possible for each reaction: i) a 'reactomics' prediction, ii) no fit  
196 found, and iii) no fit attempted. The no fit found category occurs if the solver was unable to find a  
197 solution due to no solution space existing or the inability to find the solution space or heuristic  
198 termination with no suitable solution. The no fit attempted category is due to KOPTIC being unable  
199 to fit the reaction in question when the reaction has more than two reactants (53 reactions) or has  
200 no flux during the lifecycle of Arabidopsis (61 reactions serve as in-model documentation and are  
201 intentionally blocked). Therefore, KOPTIC could fit at most 891 reactions. From all the results  
202 obtained from all the restriction sets, there are 3577 unique kinetic equation fits for 594 of 891  
203 total reactions (66.7%). To be defined as a unique kinetic equation fit, at least one of kinetic  
204 parameters, metabolic regulator, and kinetic mechanism needs to be unique. The complete set of  
205 these results are included in Supplemental File 2.

206  
207 Figure 2B shows the average number of KOPTIC results (any output for a reaction) and number  
208 of 'reactomic' predictions for runs containing the same location or identity restriction type. As  
209 shown in Figure 2B, the 'any tissues' ('at') restriction type returned on average 100 fewer kinetic  
210 equation fits, even though it had approximately the same number of total reactions returned. This  
211 is likely because the binary solution space is significantly restricted by the latter two restriction  
212 types, specifically activator ( $\Gamma_{ij}$ ) and inhibitor ( $\Omega_{ij}$ ) variables (see Supplemental File 1 for details).  
213 Binary variables  $\Gamma_{ij}$  and  $\Omega_{ij}$  corresponding to regulators that are not allowed are fixed to 0 and  
214 treated as parameters, resulting in a quicker solution and more iterations before heuristic  
215 termination.

216  
217 Figure 2C shows the error of the fits returned by KOPTIC, which is the ratio of sum of squared  
218 differences of the kinetic mechanism fits to the maximum sum of squared differences (see Methods  
219 for finding how the sum of squared differences was utilized as an error measure). Full error  
220 statistics can be found in Supplemental File 2. The 'same tissue' ('st') restriction type was more  
221 accurate than the 'any tissues' ('at') restriction type, likely because of the increased number of  
222 fixed binary variables (as previously described, see Supplemental File 1). The 'same compartment'  
223 ('sc') restriction type had a standard deviation too high to show significant mean differences from  
224 either 'at' or 'st' restriction type. The 'no proton or water' ('npw') restriction type was the least  
225 accurate, and no significant difference was found between 'no restriction' ('nr') and 'no proton,  
226 water, or energy molecule' ('npwe') restriction types. Lower error for the 'nr' restriction type  
227 (compared to the 'npw' restriction type) might be due to capturing important abiotic stress

228 regulations (e.g. osmotic and pH stress), while the lower error for the ‘npwe’ restriction type might  
229 be due to the restricted binary solution space (more fixed inhibitor and activator variables),  
230 allowing for more iterations. As many reaction fittings were heuristically terminated due to time,  
231 the accuracy of ‘npw’ was lower when compared to ‘npwe’ because the latter had more iterations  
232 in the time period allowed for solution.

233  
234 The ‘sc’ restriction type had many reactions with very poor fits (more than 50 reactions with 90%  
235 fitting error or greater). Ignoring the poorest fits and considering the error of the best 75% of fits  
236 for each reaction type, shown in Figure 2D, the ‘sc’ restriction type had a significantly lower mean  
237 error than the ‘at’ restriction type, and had a lower standard deviation and a smaller interquartile  
238 range than any other restriction type. This suggests a bimodal distribution, with reactions being  
239 either well or poorly fit by the ‘sc’ restriction type. From Figures 2C and 2D, it is evident that the  
240 KOPTIC fitting error was positively skewed, with all 3577 KOPTIC predictions having a median  
241 error of 13.44% and a mean error of 24.10%, as shown in Figure 2E. Using Pearson’s correlation,  
242 it was found that the correlation between the flux rates predicted by KOPTIC ‘reactomics’ and the  
243 flux rate given by the Arabidopsis timeline was  $r = 0.775$  ( $p \ll 0.001$ ). Additionally, 93.6% for  
244 KOPTIC ‘reactomic’ flux predictions had a significant correlation with their Arabidopsis timeline  
245 flux counterparts (e.g. same reaction, same timepoint,  $p \leq 0.05$ ). As noted in Figure 2A, the  
246 regression between Arabidopsis timeline fluxes (denoted  $v_{exp}(j, t)$ ) and KOPTIC ‘reactomic’ flux  
247 predictions (denoted  $v_{model}(j, t)$ ) was a straight line with a slope of 1 (e.g. generally  $v_{exp}(j, t) =$   
248  $v_{model}(j, t)$ ).

249  
250 To determine which types of reactions (low- or high-flux) were best fit by different restriction sets  
251 applied to KOPTIC, we determined the weighted mean sum of squared differences (as a measure  
252 of error) for each of the nine restriction sets and compared that value to the unweighted mean error.  
253 The weighted error used is  $\theta_{SSD}$ , and using this, we can say that low-flux reactions had better  
254 ‘reactomic’ predictions if  $\theta_{SSD} > \mu_{error}$ , high-flux reactions had better ‘reactomic’ predictions if  
255  $\theta_{SSD} < \mu_{error}$ , and no significant difference in ‘reactomic’ predictions if  $\theta_{SSD} \approx \mu_{error}$ .

256

$$\theta_{SSD} = \frac{\sum_j SSD_{error,j}}{\sum_j SSD_{max,j}} * 100\% \quad (1)$$

$$\mu_{error} = \frac{\sum_j \left( \frac{SSD_{err,j}}{SSD_{max,j}} \right)}{\sum_j 1} * 100\% \quad (2)$$

257

258 The location restriction type had a strong effect on what reactions were fit well by KOPTIC. For  
259 ‘at’ restriction type, low flux reactions were fit well and high flux reactions were fit poorly. This  
260 is elucidated by the values of  $\theta_{SSD}$  for the three restriction sets including this restriction type being  
261 much higher, than the raw mean errors ( $\theta_{SSD} = 86.44\%$  and  $\mu_{error} = 27.58\%$  for ‘nr’/‘at’,  
262  $\theta_{SSD} = 84.26\%$  and  $\mu_{error} = 26.52\%$  for ‘npw’/‘at’, and  $\theta_{SSD} = 71.94\%$  and  $\mu_{error} =$   
263  $26.68\%$  for ‘npwe’/‘at’). This conclusion also applied to the ‘nr’/‘st’ restriction set which had  
264 better ‘reactomic’ prediction for low-flux reactions ( $\theta_{SSD} = 55.62\%$  and  $\mu_{error} = 21.28\%$ ).  
265 There appeared to be no significant difference in goodness of ‘reactomic’ predictions for low- and  
266 high-flux reactions in the ‘npw’/‘sc’ restriction set ( $\theta_{SSD} = 26.30\%$  and  $\mu_{error} = 27.78\%$ ). High-  
267 flux reactions had better ‘reactomic’ predictions for the restriction sets ‘nr’/‘sc’ ( $\theta_{SSD} =$

268 2.70%;  $\mu_{error} = 25.32\%$ ), ‘npw’/’st’ ( $\theta_{SSD} = 12.78\%$  and  $\mu_{error} = 20.52\%$ ), ‘npwe’/’sc’  
269 ( $\theta_{SSD} = 11.12\%$  and  $\mu_{error} = 25.25\%$ ), ‘npwe’/’st’ ( $\theta_{SSD} = 16.25\%$  and  $\mu_{error} = 21.19\%$ ).

270

## 271 **KOPTIC Predicted Regulations**

272 **The Thioredoxin Regulatory Mechanism.** The Thioredoxin (Trx) regulatory mechanism  
273 reversibly reduces disulfide bonds in target enzymes, changing the enzyme structure and  
274 increasing the level of activity of the desired enzyme. The first step in the mechanism is the  
275 reduction of thioredoxin by either NADPH or Ferredoxin. This is followed by the reduction of  
276 disulfide bond in the regulated enzyme through either a short-lived activation (Trx reduces the  
277 disulfide bond), or a longer-term activation (Trx reduces the disulfide bond by forming a complex  
278 with the target enzyme, see Figure 3A) [31][32][33][34][35][36]. This is a common and reversible  
279 mechanism of allosteric protein regulation in land plants and can help plants respond to oxidative  
280 stress [35][36]. Literature reports that in land plants, the ferredoxin as the initiator is generally  
281 limited to the chloroplast, and the NADPH as the initiator is generally identified in the cytosol and  
282 mitochondria [34][35]. However, Arabidopsis contains ferredoxin and ferredoxin reductase in  
283 mitochondria [37] as well as cytosolic ferredoxin [38], making the ferredoxin regulation  
284 mechanism plausible in mitochondrial, cytosolic or chloroplastic subcellular compartments.

285

286 KOPTIC correctly predicted activation by reduced ferredoxin, inhibition by oxidized ferredoxin,  
287 activation by NADPH, and inhibition by NADP<sup>+</sup> for several enzymes, of which selected predicted  
288 thioredoxin-mechanism regulation predictions are shown in Table 2 (complete list of predictions  
289 can be found in Supplemental File 2). KOPTIC’s kinetic equations use single-step regulation  
290 mechanisms (see Figure 3B, C, D, and E); therefore, the fit equations are simplifications of the  
291 actual mechanism, using single-step rather than multi-step regulation. All regulatory mechanisms  
292 were single substrate kinetics with activation (Figure 3B) or inhibition (Figure 3C) except for  
293 ATPase, which was modeled as irreversible dual-substrate kinetics with activation (Figure 3D).  
294 For instance, in Figure 3B we know that the activator (Ac) is reduced ferredoxin, which through  
295 ferredoxin-thioredoxin reductase forms reduced thioredoxin which in-turn activates dihydroxy-  
296 acid dehydratase (E) by reducing a disulfide bond. This allows the enzyme to act on 2,3-dihydroxy-  
297 3-methylbutanoate (A), to form 3-methyl-2-oxobutanoic acid (P). For this reaction, KOPTIC  
298 lumps the intermediate regulatory steps into a single step, but with low fit error (0.17%), giving  
299 confidence that the derived kinetic parameters returned by KOPTIC capture the net effects of the  
300 intermediate steps for this reaction. Other reactions were fit by low (<10%) or moderate to high  
301 error (27 to 37%), depending on the efficacy of the single model regulation step capturing the  
302 multi-step mechanism. It is likely that the low fit error cases are activated by the transient  
303 activation mechanism (Figure 3A). One enzyme with relatively high error (ATPase, 37%) has high  
304 error because Trx activates ATPase by forming an enzyme complex [39], resulting in significantly  
305 more complex reaction kinetics which are more difficult to fit with a single step. High fit error  
306 cases are likely mechanisms with complex activation. Generally, KOPTIC is more successful in  
307 simplifying regulation mechanisms to a single step when the regulation mechanism is less  
308 complex. Despite KOPTIC’s predictive success in the examples listed in Table 2, KOPTIC made  
309 some incorrect predictions. One is that NAD-glyceraldehyde-3-phosphatase (NAD-G3P) was  
310 predicted by KOPTIC to be inhibited by Ferredoxin<sup>2+</sup>, where literature data shows that the  
311 competing reaction, NADP-G3P, is instead activated by the Trx mechanism [35][40].  
312 Additionally, aldehyde dehydrogenase was predicted by KOPTIC to be inhibited by Ferredoxin<sup>2+</sup>,  
313 when this enzyme was reported to be activated by the Trx mechanism [35].



314

315 **Inhibition of R5PI by High Water Availability.** Plant cells are able to respond to drought  
316 conditions via signaling enzymes which regulate the expression or activity of other enzymes in  
317 response. According to literature, osmotic stress (drought) activates sucrose nonfermenting-1-  
318 related protein kinase 2 (SnRK2, gene *at1G78290*) [41] which phosphorylates chloroplastic R5PI  
319 (gene *at3G04790*), increasing R5PI's activity [42]. KOPTIC predicted that leaf chloroplastic  
320 ribose 5-phosphate isomerase (R5PI) was inhibited by extracellular water *in silico* concentration,  
321 with a fitting error of 2.24%. The predicted mechanism is shown in Figure 3C. This inhibition  
322 form was detected by KOPTIC because osmotic-stress signaling is likely the rate-limiting step in  
323 the signaling pathway which increases activity of R5PI. This is because SnRK2 is activated two  
324 minutes after the onset of osmotic stress and reached maximal activity level within 0.5 to 2 hours  
325 after the onset of osmotic stress [41]. This same R5PI gene is also located in non-green plastids  
326 (as part of the pentose phosphate pathway) [43]. KOPTIC predicted that stem plastid water  
327 inhibited leaf plastid R5PI with a fitting error of 0.11% of the maximum SSD, suggesting some  
328 cross-tissue drought signaling. The mechanism of this reaction is also shown in Figure 3C.

329

330 **Transcriptional Regulation by (CN)-Signaling.** A plant cell has mechanisms for sensing carbon,  
331 nitrogen, and phosphate as signaling molecules, which allows cells to respond appropriately by  
332 increasing or decreasing gene transcription [44][45][46]. KOPTIC was able to capture microarray-  
333 verified transcriptional regulation [46] by sucrose, ammonia, and phosphate. Of a total of 11  
334 predictions, a select set of 9 predictions are summarized in Table 3 (the full set can be found in  
335 Supplemental File 3). For these predictions, all kinetic equation fits returned by KOPTIC were  
336 either single-substrate kinetics with activation (Figure 3B, product-producing step is reversible or  
337 irreversible) or inhibition (Figure 3C, product-producing step is reversible or irreversible), with  
338 the exception of 6-phosphofruktokinase which used dual-substrate kinetics with inhibition (shown  
339 in Figure 3E). The signaling pathway, transcription, and translation were “black-boxed” by the  
340 binding of the inhibitor (I) or the binding of the activator (Ac) step in the KOPTIC fit mechanisms,  
341 resulting in moderate error (6 to 20%) of fitting. As previously mentioned, it appears that KOPTIC  
342 is better at fitting less complex regulation mechanisms, therefore higher errors likely correspond  
343 to more complex transcriptional regulation.

344

345 **The TCA Cycle.** KOPTIC predicted some correct regulation predictions (with low and high error),  
346 some close to correct predictions, and some unverifiable or incorrect predictions for the TCA cycle.  
347 Examples of correct predictions are outlined in Table 4. All of these reactions had predicted  
348 inhibitions mechanisms, shown in Figures 3C and 3E. Some predictions were made close to  
349 literature reported regulations, such as leaf succinate dehydrogenase was predicted to be inhibited  
350 by isocitrate (13% error, mechanism in Figures 3C) when succinyl-CoA ligase, the previous step  
351 in the TCA cycle, is inhibited by isocitrate [47]. Additionally, leaf aconitase was predicted to be  
352 inhibited by malate (11% error, Figure 3C), where the enzyme is known to be inhibited by the  
353 structurally similar oxalomalate [47] (as the latter metabolite not present in any tissue model in  
354 this work). Incorrect and/or currently unverifiable (due to no published *in vivo* evidence)  
355 regulations often predicted fumarate as a regulator for a variety of mitochondrial enzymes  
356 including aconitase, isocitrate dehydrogenase, and malate dehydrogenase (error ranges from 15 to  
357 39%, mechanisms shown in Figures 3B and Figures 3C).

358

359 **Discussion**

360 In this work, a four core metabolic models of Arabidopsis tissues (leaf, root, seed, and stem) [23]  
361 was used to as a base stoichiometric model to which KOPTIC was applied. This model linked all  
362 four tissue models in a comprehensive Flux Balance Analysis (FBA), multi-level optimization  
363 framework, which allowed interactions inside and between of the plant tissues [23]. This  
364 framework then calculated the reaction flux vectors and also estimated *in silico* metabolite  
365 concentration (based on metabolite pool sizes) at 1464 time points, each separated by one hour, in  
366 the Arabidopsis lifecycle to simulate changes in reaction fluxes at various time points, of which  
367 61 time points, each separated by 24 hours, were selected to apply KOPTIC to due to  
368 computational limitations. We applied our KOPTIC approach to the 61 Arabidopsis time points  
369 from p-ath780. KOPTIC found optimal fit solutions for 594 of a possible 891 (66.7%) reactions.  
370 A relatively low median error of fits (13.44%) suggests that KOPTIC is a viable method for  
371 predicting ‘reactomics’ from accurate stoichiometric models for *in silico* study of reaction kinetics  
372 and mechanisms, as well as for the development of kMMs. KOPTIC is a particularly promising  
373 method when the model builders have little experience with creating kMMs or when there is little  
374 regulatory information available, such as for understudied metabolic systems, as KOPTIC offers  
375 an *in silico* workflow for semi-automating the creation of kMMs that enable the discovery and  
376 study of regulatory mechanisms.

377  
378 From the error analysis performed, we can see that the ‘sc’ restriction type can produce lower error  
379 (see Figures 2C) for many reactions and can produce superior fits for high-flux reactions ( $\theta_{SSD} <$   
380  $\mu_{error}$ ), while producing higher error for others. We hypothesize that when the ‘sc’ restriction type  
381 has low error it is accurately capturing some regulation with a regulatory metabolite acting directly  
382 on the enzyme; however, not all enzymes are directly regulated by a metabolite, resulting in a  
383 number of high-error predictions. Conversely, the ‘nr’ restriction type produces superior  
384 ‘reactomics’ for low-flux reactions ( $\theta_{SSD} < \mu_{error}$ ). The ‘st’ restriction type produces a balanced  
385 approach to predicting reactomics, generally favoring neither low- nor high-flux reactions.

386  
387 From the predicted regulation case studies discussed here, it was shown that the KOPTIC  
388 predictions can correctly predict abiotic stress responses (such as drought), multi-step allosteric  
389 regulation mechanisms (such as the Trx mechanism), and transcriptional regulation (such as (CN)-  
390 signaling). Generally, the less complex the regulatory mechanism predicted was, the higher the  
391 was the accuracy of the KOPTIC ‘reactomic’ fit. KOPTIC currently predicted TCA cycle  
392 regulation with mixed accuracy. When close-to-true or incorrect regulatory mechanisms were  
393 predicted by KOPTIC, they were often reasonable. For instance, leaf succinate dehydrogenase was  
394 predicted to be inhibited by isocitrate, but literature showed that succinyl-CoA ligase is inhibited  
395 by isocitrate [47] instead. It is reasonable that the inhibition of the immediately upstream reaction  
396 would result in a lower flux for the reaction catalyzed by succinate dehydrogenase. Furthermore,  
397 it is reasonable for KOPTIC to conclude that malate inhibits aconitase in the absence of  
398 oxalomalate in the model [47] as these metabolites are structurally similar.

399  
400 Despite these successes, there is room for improvement in KOPTIC, for instance, the TCA cycle  
401 had many incorrect predictions or correct predictions with high error. A common incorrect (or  
402 unverifiable) prediction was predicting the regulation of TCA cycle reactions by fumarate. We  
403 hypothesize the fumarate was a common prediction because in the mitochondria of the tissue  
404 models, only TCA and oxidative phosphorylation pathways occurred. Therefore, for the ‘sc’  
405 restriction type, a reaction in these pathways must be regulated by a metabolite in these pathways.

406 Fumarate might have been optimal because it is the metabolite in the TCA cycle before malate and  
407 oxaloacetate. Both of these metabolites can be transported into or out of the mitochondria.  
408 Therefore, the *in silico* concentration of fumarate would be a better indicator of the rate of flux  
409 through the TCA cycle and would yield ‘reactomic’ predictions with lower error.

410  
411 Furthermore, some reaction regulation predictions did not make sense and/or were incorrect. These  
412 were often due to limitations of the solver options used, in that the solver terminated when the  
413 absolute solution gap was less than  $1e^{-5}$ . When the reactions have small fluxes throughout the  
414 lifetime of the plant ( $\sum_j SSD_{max,j} < 0.01$ ), the solution method would often reach the termination  
415 criteria either in preprocessing or in the first few iterations, accepting one of the first potential  
416 regulators found. Simply reducing the absolute optimality criteria would result in the problem  
417 being mostly addressed for low flux reactions. However, this exacerbates the solution time for  
418 high flux reactions as the optimality criteria will be met only at very low error ( $\ll 1\%$ ) which will  
419 take considerable time to converge, significantly increasing KOPTIC run time as termination will  
420 rely on a time-based heuristic. Instead, a scaling factor will be applied to the KOPTIC objective  
421 function in future versions for heuristic termination at a fixed SSD error percentage. This will  
422 ideally not only fix the problem of high error associated with low flux reactions but also increase  
423 KOPTIC solution speed for high flux reactions and will allow user-defined error thresholds.

424  
425 In addition, we will seek to sophisticate KOPTIC in order to increase its predictive capabilities  
426 and the number of reactions fit, as well as the optimize goodness of fit. One promising direction is  
427 to solve first by restricting possible regulators to the same compartment, then widen the location  
428 restriction on the regulator if a poor fit is achieved. Additionally, we will consider the likelihood  
429 of a metabolite being a regulator and use that information to point KOPTIC toward a more  
430 reasonable regulator earlier in the solution process. Further, we will expand the set of kinetic  
431 equations from which KOPTIC has to choose in order to make ‘reactomic’ predictions for  
432 reactions with more than two substrates. Moreover, effectively fixing  $V_{max}$  in the Michealis-  
433 Menten equation, we assume constant (or near constant) enzyme level. This assumption may be  
434 driving fit error, and therefore in future iterations of KOPTIC we will allow the *in silico* enzyme  
435 concentration to vary across time or condition. In addition, we will seek to decrease the  
436 computational cost of KOPTIC so that more data may be used and that KOPTIC solutions might  
437 be more quickly achieved.

438  
439 KOPTIC will be used in future to develop condition-specific kinetic models of metabolism. By  
440 analyzing the ‘reactomic’ predictions for each reaction, we can choose to accept, reject, or seek  
441 validation for each. The set of ‘best reactomics’ (as defined by the model curator) for each reaction  
442 can be concatenated into a kinetic model of metabolism. The ‘best reactomics’ may be defined by  
443 literature validation of reaction mechanism or kinetic parameters. Alternatively, the ‘best  
444 reactomics’ may be defined as those corresponding to the restriction set which is most relevant for  
445 an organism, the desired growth conditions, or the desired genetic interventions. For instance, the  
446 ‘nr’ restriction type would be preferable when studying metabolic response to drought or pH stress  
447 conditions.

448  
449 **Methods**  
450 **Development and Use of the P-ath780 Model.** The p-ath780 model was developed in detail in  
451 our recent study [23]. In summary, this Arabidopsis model was developed in order to address the

452 limitations of current stoichiometric models of metabolism which only take a single “snapshot” of  
453 organism metabolism which may not be suitable for organisms whose growth cannot be held at  
454 some steady state condition (such as multi-cellular organisms). By taking a series of “snapshots”  
455 of organisms metabolism across its lifecycle, using a Flux Balance Analysis (FBA) based  
456 approach, a more accurate and holistic picture of organism metabolism can be obtained. As with  
457 the KOPTIC tool, Arabidopsis was chosen for this work as a model organism [13]. The p-ath780  
458 model focuses on the core-carbon metabolism of Arabidopsis and models seven distinct growth  
459 stages across 61 days of growth, taking “snapshots” of metabolism at one-hour intervals. The p-  
460 ath780 model agreed well with published literature data including mass yield, maintenance costs,  
461 senescence costs, and whole-plant growth checkpoints [23]. In this current work, the reaction flux  
462 rates at each “snapshot” was used in part as data input to KOPTIC as the target reaction rate fluxes  
463 of the fit kinetic equations. Specifically, due to the computational cost of the KOPTIC method at  
464 present, only 61 of the “snapshots” were used, one representing each day of the Arabidopsis  
465 lifecycle.

466  
467 **Calculation of *in silico* Metabolite Concentration.** In order to estimate *in silico* metabolite  
468 concentration, in a specific tissue, we first calculated the metabolic pool size [48] for each of the  
469 metabolites from the corresponding tissue models. *In silico* metabolite concentration represents an  
470 estimate of the concentration of a given metabolite in a given tissue or compartment, based on the  
471 summation of flux of reactions through that metabolite that is converted to concentration unit. The  
472 conversion was done using tissue growth rate (as a dilution factor) and tissue density (as a volume  
473 estimate from *in silico* plant mass). This follows from the assumptions that the flux through a  
474 metabolite will be greater in a metabolite with higher *in vivo* concentration, and that this estimate  
475 can be used in place of an *in vivo* concentration measurements in reaction kinetics. We further  
476 assumed that each sub-cellular compartment grows at the same rate as the tissue, that metabolite  
477 concentration is uniform in a subcellular compartment, and that each subcellular compartment is  
478 of the same density as the tissue. While these assumptions are oversimplifications of an *in vivo*  
479 system, they were necessary for *in silico* representation as quantitative *in vivo* data necessary to  
480 drop these assumptions is not available.

481

$$p_i = \frac{1}{2} \sum_{j \in J} |S_{ij} v_j| \quad (3)$$

482  
483 Equation (2) provides an estimate of the availability of the metabolite in a given tissue system in  
484 units of  $mmol/gDW * h$ . Here,  $p_i$  is the metabolite pool size of metabolite  $i$ ,  $S_{ij}$  is the  
485 stoichiometric coefficient of metabolite  $i$  in reaction  $j$ , and  $v_j$  is the flux of reaction  $j$  in which  $i$   
486 participates as a reactant or product. We converted this pool size value to an estimate of *in silico*  
487 metabolite concentration by using *in silico* biomass growth rate of the specific tissue  
488 ( $v_{biomass,tissue}$ ) and the tissue density ( $\rho_{tissue}$ ) [25][26][49][50][51][52]. To this end, the  
489 following conversion was used:

490

$$c_i = \frac{p_i \rho_{tissue}}{v_{biomass,tissue}} \quad (4)$$

491  
492 This conversion provided the estimate for all *in silico* metabolite concentration estimates used by  
493 KOPTIC.

494  
 495 **Development of KOPTIC.** The KOPTIC method development, logic, derivation, symbol  
 496 definition, and equations used can be found in Supplemental File 1, and the KOPTIC workflow is  
 497 shown in Figure 1. In summary, we developed KOPTIC to study and predict kinetics of any  
 498 biological system and to eventually develop kinetic models based on computational (such as FBA)  
 499 or experimental (such as MFA) datasets. As previously discussed, KOPTIC uses twelve kinetic  
 500 equation forms, from four reaction types with three possible types of regulation each, to find an  
 501 optimal fit of the experimental data by one of these equation forms. KOPTIC returns ‘reactomic’  
 502 data of kinetic equation, kinetic parameters, and regulatory information. This is accomplished  
 503 through an objective function that minimizes the sum of squared differences between the flux of  
 504 reaction  $j$  as derived from the kinetic model  $v_{model}(j, t)$ , and the corresponding known (i.e., MFA)  
 505 or calculated (i.e., FBA) reaction flux input into KOPTIC, assigned to parameter set  $v_{exp}(j, t)$ .  
 506 Variable  $v_{model}(j, t)$  and parameter  $v_{exp}(j, t)$  are calculated for each time point or condition  $t$  in  
 507 the set of time points or conditions  $T$ . KOPTIC is parallelizable in that the optimization  
 508 formulation is solved for each input reaction independently (as solving all reactions at the same  
 509 time is impractical as of yet due to computational time and cost), with the following objective  
 510 function:

$$511 \quad \text{minimize } z = \sum_{t \in T} \left( v_{exp}(j, t) - v_{model}(j, t) \right)^2 + \epsilon \sum_{m=1}^6 K_m(j) \quad \forall j \in J \quad (5)$$

512  
 513 Where  $K_m, m = [1, 6], m \in \mathbb{Z}$  is the set of kinetic parameters which are optimized to improve the  
 514 fit of  $v_{model}(j, t)$ . There are at most six  $K_m$  parameters used to improve the fit of  $v_{model}(j, t)$  (see  
 515 Supplementary File 2). The modeled flux is defined as:

$$516 \quad v_{model}(j, t) = \beta_{1,j} [b_{1,j}(v_{SIN}(j, t)) + b_{2,j}(v_{SII}(j, t)) + b_{3,j}(v_{SIA}(j, t))] \\
 + \beta_{2,j} [b_{1,j}(v_{SRN}(j, t)) + b_{2,j}(v_{SRI}(j, t)) + b_{3,j}(v_{SRA}(j, t))] \\
 + \beta_{3,j} [b_{1,j}(v_{DIN}(j, t)) + b_{2,j}(v_{DII}(j, t)) + b_{3,j}(v_{DIA}(j, t))] \\
 + \beta_{4,j} [b_{1,j}(v_{DRN}(j, t)) + b_{2,j}(v_{DRI}(j, t)) + b_{3,j}(v_{DRA}(j, t))] \quad (6)$$

517  
 518 Where  $\beta_{u,j}$  are binary parameters defined by the stoichiometric model, in this case p-ath780, and  
 519 restricted to  $\beta_{1,j} + \beta_{2,j} + \beta_{3,j} + \beta_{4,j} = 1$ . Parameter  $\beta_{1,j} = 1$  corresponds to a single-substrate  
 520 irreversible (SI) reaction,  $\beta_{2,j} = 1$  corresponds to a single-substrate reversible reaction,  $\beta_{3,j} = 1$   
 521 corresponds to a dual-substrate irreversible (DI) reaction, and  $\beta_{4,j} = 1$  corresponds to a dual-  
 522 substrate reversible (DR) reaction. Parameters  $\beta$  were set as parameters, rather than being  
 523 combined with  $b$  variables in a single variable, to reduce the number of binary variables used in  
 524 the formulation, which decreases solution time. Binary variables  $b_{y,j}$  are defined by optimization,  
 525 as KOPTIC chooses the optimal regulatory mechanism. As with  $\beta_{u,j}$  parameters,  $b_{1,j} + b_{1,j} +$   
 526  $b_{1,j} = 1$ , limiting KOPTIC to selecting a single regulatory mechanism. While often enzymes have  
 527 multiple regulators, only a single regulator is allowed in the current formulation because of the  
 528 form of the 12 kinetic equations derived (a new equation must be derived for each additional  
 529 regulator). A single regulator equation form, with restriction sets being used to identify multiple  
 530 possible regulators acting independently, allows identification of multiple regulators of a single

531 enzyme. Variable  $b_{1,j} = 1$  corresponds to no (N) regulation,  $b_{2,j} = 1$  corresponds to inhibition (I)  
532 regulation, and  $b_{3,j} = 1$  corresponds to activation (A) regulation. This forces  $v_{\text{model}}(j, t)$  to equal  
533 exactly one of the kinetic forms. For simplicity, reactions with more than two substrates were not  
534 included due to the complexity of the kinetic equation forms and other regulation scenarios were  
535 not considered.

536  
537 To understand how the ‘reactomics’ are predicted, consider if the optimal ‘reactomics’ of a  
538 reaction is single-substrate irreversible kinetics with no regulation (SIN,  $\beta_{1,j} = b_{1,j} = 1$ ), then  
539  $v_{\text{model}}(j, t)$  is defined as below.

540

$$v_{\text{model}}(j, t) = v_{\text{SIN}}(j, t) = \frac{K_1(\vec{A}^T \cdot \vec{C}_t)}{(\vec{A}^T \cdot \vec{C}_t) + K_2 + \eta} \quad (7)$$

541  
542 Where  $\vec{C}_t$  is a concentration vector from the Arabidopsis lifecycle FBA or from the MFA  
543 measurements,  $\vec{A}^T$  is a vector of unit magnitude which points at the substrate,  $K_1$  (akin to  $V_{\text{max}}$ ,  
544 the maximum reaction flux in the Michaelis-Menten equation) and  $K_2$  (akin to  $K_M$ , the Michealis-  
545 Menten constant) are fitting parameters, and  $\eta$  is a very small number (here  $\eta = 1e^{-7}$ ) used to  
546 prevent errors when  $(\vec{A}^T \cdot \vec{C}_t) + K_2 = 0$ . The objective function term involving  $K_m(j)$  is used to  
547 prevent non-unique solutions resulting from multiple sets of  $K_m(j)$  values yielding the same sum  
548 of squared differences. This term has minimal effect on the optimal solution in that  $\epsilon$  is an arbitrary  
549 small number  $\epsilon = 1e^{-7}$ . Further constraints applied to the optimization problem include twelve  
550 constraints to define each of the twelve kinetic equation forms, six constraints to ensure that  $M \geq$   
551  $K_m(j) \geq \eta$ , where  $M = 1e^5$ , when used in the optimal kinetic equation form, four constraints to  
552 fix  $K_m(j) = 0$  when not used in the optimal kinetic equation form, and three constraints to ensure  
553 that a single kinetic equation form is selected and that only one metabolite is chosen as the optimal  
554 regulator. Because of the large range of possible values which  $K_m(j)$  may take (spanning 12 order  
555 of magnitude), and also regulation forms having terms in which the *in silico* concentration of the  
556 regulator metabolite is modulated by one or more  $K_m(j)$  values, the magnitude of the *in silico*  
557 concentration of any metabolite relative to that of the reaction is largely immaterial. The pattern  
558 of *in silico* concentration of the metabolite to the pattern of reaction flux is more important in  
559 determining an optimal metabolic regulator.

560  
561 **KOPTIC Workflow.** We used the 61 time point FBA-derived reaction fluxes and *in silico*  
562 metabolite concentration estimates from p-ath780 as input data for KOPTIC, as shown in Figure  
563 1. The KOPTIC formulation and symbols used in Figure 1 is discussed in the previous section and  
564 full details can be found in Supplemental File 1. Each KOPTIC run is restricted by one of the nine  
565 restriction sets (each set is a unique combination of identity and location restriction type, see Table  
566 1) in order to identify multiple feasible combinations of regulating a metabolite and its location.  
567 This is advantageous as from the results we can choose the most plausible or best fitting kinetic  
568 equation form (as explained earlier). Each of the nine runs had 10 parallel instances starting at  
569 staggered model reactions to increase solution speed. This staggering is necessary as KOPTIC  
570 does not find solutions for most reactions in the model in a seven-day timeframe. Therefore, we  
571 can take these parallel instances and concatenate the results to get full coverage of the model (so  
572 that KOPTIC returned something for every reaction). The KOPTIC formulation was solved using  
573 BARON, an MINLP solver on the Generic Algebraic Modeling System (GAMS) [53], and each

574 reaction solution yielded ‘reactomic’ predictions and model error (as a percentage of maximum  
575 SSD). We allowed 168 hours of runtime for each parallel instance, and when finished we  
576 concatenated the results of the appropriate instances into the results for each run.

577  
578 **Error of Kinetic Fits by KOPTIC.** Errors in kinetic equation fittings made by KOPTIC were  
579 described as a percentage of the maximum sum of squared differences. Equations used to describe  
580 error are shown below, where  $T$  is the set of 61 time points in the Arabidopsis lifecycle:  
581

$$SSD_{err,j} = \sum_{t \in T} (v_{exp}(j, t) - v_{model}(j, t))^2 \quad (8)$$

$$SSD_{max,j} = \sum_{t \in T} (v_{exp}(j, t))^2 \quad (9)$$

$$Fit\ Error_j = \frac{SSD_{err,j}}{SSD_{max,j}} * 100\% \quad (10)$$

582  
583 This  $Fit\ Error_j$  was used in the statistical analysis of this work to determine how well KOPTIC  
584 fit the 61 timepoint data given with the predicted ‘reactomics’.

585  
586 **Statistical Analysis of Error.** All statistical tests were performed using a between-group ANOVA  
587 analysis with a significance cutoff of  $\alpha = 0.05$ . See Supplementary Text S3 for test statistic values  
588 and p-values of the statistical tests done.

589  
590 **Acknowledgement.** This work was completed utilizing the Holland Computing Center of the  
591 University of Nebraska, which receives support from the Nebraska Research Initiative. The  
592 authors gratefully acknowledge funding from UNL Faculty Startup Grant 21-1106-4038.

593  
594 **Author Contributions.** Experiments were conceived by R.S. and W.L.S. W.L.S. performed the  
595 experiments and analyzed the data. R.S. and W.L.S. contributed analysis tools. R.S. and W.L.S.  
596 wrote the manuscript.

597  
598 **Supplementary Information** is linked to the online version of the paper.

599  
600 **Competing financial interests:** The authors declare no competing financial interests.  
601

602 **References**

- 603 [1] P. Beyer *et al.*, “Golden Rice: introducing the beta-carotene biosynthesis pathway into rice  
604 endosperm by genetic engineering to defeat vitamin A deficiency,” *J. Nutr.*, vol. 132, no.  
605 3, pp. 506S-510S, 2002.
- 606 [2] R. D. Hall, I. D. Brouwer, and M. A. Fitzgerald, “Plant metabolomics and its potential  
607 application for human nutrition,” *Physiol. Plant.*, vol. 132, no. 2, pp. 162–175, 2008.
- 608 [3] S. Gonzali, A. Mazzucato, and P. Perata, “Purple as a tomato: towards high anthocyanin  
609 tomatoes,” *Trends Plant Sci.*, vol. 14, no. 5, pp. 237–241, 2009.
- 610 [4] C. J. Paddon and J. D. Keasling, “Semi-synthetic artemisinin: A model for the use of  
611 synthetic biology in pharmaceutical development,” *Nat. Rev. Microbiol.*, vol. 12, no. 5,  
612 pp. 355–367, 2014.
- 613 [5] V. A. Hilder and D. Boulter, “Genetic engineering of crop plants for insect resistance - A  
614 critical review,” *Crop Prot.*, vol. 18, no. 3, pp. 177–191, 1999.
- 615 [6] T. H. H. Chen and N. Murata, “Enhancement of tolerance of abiotic stress by metabolic  
616 engineering of betaines and other compatible solutes,” *Curr. Opin. Plant Biol.*, vol. 5, no.  
617 3, pp. 250–257, 2002.
- 618 [7] S. Srinivasan, W. R. Cluett, and R. Mahadevan, “Constructing kinetic models of  
619 metabolism at genome-scales: A review,” *Biotechnol. J.*, vol. 1359, pp. 1345–1359, 2015.
- 620 [8] J. D. Orth, I. Thiele, and B. O. Palsson, “What is flux balance analysis?,” *Nat. Publ. Gr.*,  
621 vol. 28, no. 3, pp. 245–248, 2010.
- 622 [9] A. P. Burgard, P. Pharkya, and C. D. Maranas, “OptKnock: A Bilevel Programming  
623 Framework for Identifying Gene Knockout Strategies for Microbial Strain Optimization,”  
624 *Biotechnol. Bioeng.*, vol. 84, no. 6, pp. 647–657, 2003.
- 625 [10] S. Ranganathan, P. F. Suthers, and C. D. Maranas, “OptForce: An optimization procedure  
626 for identifying all genetic manipulations leading to targeted overproductions,” *PLoS*  
627 *Comput. Biol.*, vol. 6, no. 4, 2010.
- 628 [11] R. Saha, D. Liu, A. H. Connor, M. Liberton, J. Yu, and M. Bhattacharyya-pakrasi,  
629 “Diurnal Regulation of Cellular Processes in the Cyanobacterium *Synechocystis* sp .  
630 Strain PCC 6803 : Insights from Transcriptomic ,” *MBio*, vol. 7, no. 3, pp. 1–14, 2016.
- 631 [12] C. Y. Ng, M. Jung, J. Lee, and M.-K. Oh, “Production of 2,3-butanediol in  
632 *Saccharomyces cerevisiae* by in silico aided metabolic engineering,” *Microb. Cell Fact.*,  
633 vol. 11, no. 1, p. 68, 2012.
- 634 [13] M. G. Poolman, L. Miguet, L. J. Sweetlove, and D. A. Fell, “A genome-scale metabolic  
635 model of *Arabidopsis* and some of its properties,” *Plant Physiology*, vol. 151, no. 3. pp.  
636 1570–81, 2009.
- 637 [14] C. Gomes de Oliveira Dal’Molin, L.-E. Quek, R. W. Palfreyman, S. M. Brumbley, and L.  
638 K. Nielsen, “AraGEM, a Genome-Scale Reconstruction of the Primary Metabolic  
639 Network in *Arabidopsis*,” *Plant Physiol.*, vol. 152, pp. 579–589, 2010.
- 640 [15] R. Saha, P. F. Suthers, and C. D. Maranas, “Zea mays iRS1563: A comprehensive  
641 genome-scale metabolic reconstruction of maize metabolism,” *PLoS One*, vol. 6, no. 7,  
642 2011.
- 643 [16] C. G. de Oliveira Dal’Molin, L.-E. Quek, R. W. Palfreyman, S. M. Brumbley, and L. K.  
644 Nielsen, “C4GEM, a Genome-Scale Metabolic Model to Study C4 Plant Metabolism,”  
645 *Plant Physiol.*, vol. 154, no. 4, pp. 1871–1885, 2010.
- 646 [17] M. G. Poolman, S. Kundu, R. Shaw, and D. A. Fell, “Responses to Light Intensity in a  
647 Genome-Scale Model of Rice Metabolism,” *Plant Physiol.*, vol. 162, no. 2, pp. 1060–



- 648 1072, 2013.
- 649 [18] M. M. Islam and R. Saha, “Computational Approaches on Stoichiometric and Kinetic  
650 Modeling for Efficient Strain Design,” in *Synthetic Metabolic Pathways*, 2018, pp. 63–82.
- 651 [19] A. Khodayari and C. D. Maranas, “A genome-scale *Escherichia coli* kinetic metabolic  
652 model satisfying flux data for multiple mutant strains,” *Nat. Commun.*, vol. 7, pp. 1–12,  
653 2016.
- 654 [20] L. M. Tran, M. L. Rizk, and J. C. Liao, “Ensemble modeling of metabolic networks,”  
655 *Biophys. J.*, vol. 95, no. 12, pp. 5606–5617, 2008.
- 656 [21] A. Khodayari, A. Chowdhury, and C. D. Maranas, “Succinate Overproduction: A Case  
657 Study of Computational Strain Design Using a Comprehensive *Escherichia coli* Kinetic  
658 Model,” *Front. Bioeng. Biotechnol.*, vol. 2, no. January, 2015.
- 659 [22] H. Link, K. Kochanowski, and U. Sauer, “Systematic identification of allosteric protein-  
660 metabolite interactions that control enzyme activity in vivo,” *Nat. Biotechnol.*, vol. 31, no.  
661 4, pp. 357–361, 2013.
- 662 [23] W. L. Schroeder and R. Saha, “A Computational Framework to Study the Primary  
663 Lifecycle Metabolism of *Arabidopsis thaliana*,” *bioRxiv Syst. Biol.*, pp. 1–61, 2019.
- 664 [24] A. R. Zomorodi and C. D. Maranas, “OptCom: A multi-level optimization framework for  
665 the metabolic modeling and analysis of microbial communities,” *PLoS Comput. Biol.*, vol.  
666 8, no. 2, pp. 1–13, 2012.
- 667 [25] D. C. Boyes *et al.*, “Growth Stage-Based Phenotypic Analysis of *Arabidopsis* : A Model  
668 for High Throughput Functional Genomics in Plants,” *Plant Cell*, vol. 13, no. July, pp.  
669 1499–1510, 2001.
- 670 [26] B. Li, J.-I. Suzuki, and T. Hara, “Latitudinal variation in plant size and relative growth  
671 rate in *Arabidopsis thaliana*,” *Oecologia*, vol. 115, pp. 293–301, 1998.
- 672 [27] M. G. R. Cannell and J. H. M. Thornley, “Modeling the Components of Plant Respiration:  
673 Some Guiding Principles,” *Ann. Bot.*, vol. 85, pp. 45–54, 1999.
- 674 [28] J. H. M. Thornley and M. G. R. Cannell, “Modelling the Components of Plant  
675 Respiration: Representation and Realism,” *Ann. Bot.*, vol. 85, pp. 55–56, 1999.
- 676 [29] Jeffery S. Amthor, “The role of maintenance respiration in plant growth,” *Plant, Cell  
677 Environ.*, vol. 7, no. 8, pp. 561–569, 1984.
- 678 [30] M. J. Clauss and L. W. Aarssen, “Phenotypic Placity of Size--Fecundity Relationships in  
679 *Arabidopsis Thaliana*,” *J. Ecol.*, vol. 82, no. 3, pp. 447–455, 1994.
- 680 [31] J. König, M. Muthuramalingam, and K. J. Dietz, “Mechanisms and dynamics in the  
681 thiol/disulfide redox regulatory network: Transmitters, sensors and targets,” *Curr. Opin.  
682 Plant Biol.*, vol. 15, no. 3, pp. 261–268, 2012.
- 683 [32] C. Lee *et al.*, “Redox regulation of OxyR requires specific disulfide bond formation  
684 involving a rapid kinetic reaction path,” *Nat. Struct. Mol. Biol.*, vol. 11, no. 12, pp. 1179–  
685 1185, 2004.
- 686 [33] J. H. Wong *et al.*, “Thioredoxin targets of developing wheat seeds identified by  
687 complementary proteomic approaches,” *Phytochemistry*, vol. 65, no. 11, pp. 1629–1640,  
688 2004.
- 689 [34] Y. Balmer *et al.*, “Thioredoxin links redox to the regulation of fundamental processes of  
690 plant mitochondria,” *Proc. Natl. Acad. Sci.*, vol. 101, no. 8, pp. 2642–2647, 2004.
- 691 [35] F. Montrichard, F. Alkhalfioui, H. Yano, W. H. Vensel, W. J. Hurkman, and B. B.  
692 Buchanan, “Thioredoxin targets in plants: The first 30 years,” *J. Proteomics*, vol. 72, no.  
693 3, pp. 452–474, 2009.

- 694 [36] P. Schürmann and B. B. Buchanan, “The Ferredoxin/Thioredoxin System of Oxygenic  
695 Photosynthesis,” *Antioxid. Redox Signal.*, vol. 10, no. 7, pp. 1235–1274, 2008.
- 696 [37] K. Takubo *et al.*, “Identification and molecular characterization of mitochondrial  
697 ferredoxins and ferredoxin reductase from Arabidopsis,” *Plant Mol. Biol.*, vol. 52, no. 4,  
698 pp. 817–830, 2003.
- 699 [38] H. Ye, G. F. Garifullina, S. E. Abdel-Ghany, L. Zhang, E. A. H. Pilon-Smits, and M.  
700 Pilon, “The chloroplast NifS-like protein of Arabidopsis thaliana is required for iron-  
701 sulfur cluster formation in ferredoxin,” *Planta*, vol. 220, no. 4, pp. 602–608, 2005.
- 702 [39] Y. Balmer, A. Koller, G. Del Val, P. Schürmann, and B. B. Buchanan, “Proteomics  
703 uncovers proteins interacting electrostatically with thioredoxin in chloroplasts,”  
704 *Photosynth. Res.*, vol. 79, no. 3, pp. 275–280, 2004.
- 705 [40] L. Michelet *et al.*, “Redox regulation of the Calvin–Benson cycle: something old,  
706 something new,” *Front. Plant Sci.*, vol. 4, no. November, pp. 1–21, 2013.
- 707 [41] T. Umezawa, R. Yoshida, K. Maruyama, K. Yamaguchi-Shinozaki, and K. Shinozaki,  
708 “SRK2C, a SNF1-related protein kinase 2, improves drought tolerance by controlling  
709 stress-responsive gene expression in Arabidopsis thaliana,” *Proc. Natl. Acad. Sci.*, vol.  
710 101, no. 49, pp. 17306–17311, 2004.
- 711 [42] R. Shin, S. Alvarez, A. Y. Burch, J. M. Jez, and D. P. Schachtman, “Phosphoproteomic  
712 identification of targets of the Arabidopsis sucrose nonfermenting-like kinase SnRK2.8  
713 reveals a connection to metabolic processes,” *Proc. Natl. Acad. Sci.*, vol. 104, no. 15, pp.  
714 6460–6465, 2007.
- 715 [43] P. A. Howles *et al.*, “A mutation in an Arabidopsis ribose 5-phosphate isomerase reduces  
716 cellulose synthesis and is rescued by exogenous uridine,” *Plant J.*, vol. 48, no. 4, pp. 606–  
717 618, 2006.
- 718 [44] F. Rolland, E. Baena-Gonzalez, and J. Sheen, “Sugar Sensing and Signaling in Plants:  
719 Conserved and Novel Mechanisms,” *Annu. Rev. Plant Biol.*, vol. 57, no. 1, pp. 675–709,  
720 2006.
- 721 [45] M. Lei *et al.*, “Genetic and Genomic Evidence That Sucrose Is a Global Regulator of Plant  
722 Responses to Phosphate Starvation in Arabidopsis,” *Plant Physiol.*, vol. 156, no. 3, pp.  
723 1116–1130, 2011.
- 724 [46] P. M. Palenchar, A. Kouranov, L. V Lejay, and G. M. Coruzzi, “Genome-wide patterns of  
725 carbon and nitrogen regulation of gene expression validate the combined carbon and  
726 nitrogen (CN)-signaling hypothesis in plants,” *Genome Biol.*, vol. 5, no. 11, p. R91, 2004.
- 727 [47] A. Nunes-Nesi, W. L. Araújo, T. Obata, and A. R. Fernie, “Regulation of the  
728 mitochondrial tricarboxylic acid cycle,” *Curr. Opin. Plant Biol.*, vol. 16, no. 3, pp. 335–  
729 343, 2013.
- 730 [48] M. Simons *et al.*, “Nitrogen-use efficiency in maize (*Zea mays* L.): From ‘omics’ studies  
731 to metabolic modelling,” *J. Exp. Bot.*, vol. 65, no. 19, pp. 5657–5671, 2014.
- 732 [49] E. Garnier and G. Laurent, “Leaf Anatomy, Specific Mass and Water-Content in  
733 Congeneric Annual and Perennial Grass Species,” *New Phytol.*, vol. 128, no. 4, pp. 725–  
734 736, 1994.
- 735 [50] P. N. Benfey, P. J. Linstead, K. Roberts, J. W. Schiefelbein, M.-T. Hauser, and R. A.  
736 Aeschbacher, “Root development in Arabidopsis: four mutants with dramatically altered  
737 root morphogenesis,” *Development*, vol. 119, pp. 57–70, 1993.
- 738 [51] S. Baud, J. Boutin, M. Miquel, L. Lepiniec, and C. Rochat, “An integrated overview of  
739 seed development in Arabidopsis thaliana ecotype WS,” *Plant Physiol. Biochem.*, vol. 40,

- 740 pp. 151–160, 2002.
- 741 [52] M. Suh, A. Samuels, and R. Jetter, “Cuticular lipid composition, surface structure, and  
742 gene expression in Arabidopsis stem epidermis,” *Plant Physiol.*, vol. 139, pp. 1649–1665,  
743 2005.
- 744 [53] M. Tawarmalani and N. V Sahinidis, “A polyhedral branch-and-cut approach to global  
745 optimization,” *Math. Program. Ser. B*, vol. 103, pp. 225–249, 2005.
- 746 [54] E. Ruelland and M. Miginiac-Maslow, “Regulation of chloroplast enzyme activities by  
747 thioredoxins: Activation or relief from inhibition?,” *Trends Plant Sci.*, vol. 4, no. 4, pp.  
748 136–141, 1999.
- 749 [55] R. Muller, M. Morant, H. Jarmer, L. Nilsson, and T. H. Nielsen, “Genome-Wide Analysis  
750 of the Arabidopsis Leaf Transcriptome Reveals Interaction of Phosphate and Sugar  
751 Metabolism,” *Plant Physiol.*, vol. 143, no. 1, pp. 156–171, 2006.
- 752 [56] W. L. Araujo, A. Nunes-Nesi, Z. NSKI, L. J. Sweetlove, and A. R. Fernie, “Metabolic  
753 control and regulation of the tricarboxylic acid cycle in photosynthetic and heterotrophic  
754 plant tissues,” *Plant. Cell Environ.*, vol. 35, no. 1, pp. 1–21, 2012.
- 755

## TABLES

**Table 1:** Restriction types used to create the nine KOPTIC restriction sets.

|                            |        |                                                                                                                                                        |
|----------------------------|--------|--------------------------------------------------------------------------------------------------------------------------------------------------------|
| Location Restriction Types | 'at'   | The regulating metabolite may be in <b>any compartment of any tissue</b> .                                                                             |
|                            | 'st'   | The regulating metabolite must be in the <b>same tissue</b> as the reaction, but can be in any subcellular compartment.                                |
|                            | 'sc'   | The regulating metabolite must be in the <b>same tissue and subcellular compartment</b> as the reaction.                                               |
| Identity Restriction Types | 'nr'   | <b>No restrictions</b> are placed on the identity of the regulating metabolite, any metabolite including excess metabolites such as water are allowed. |
|                            | 'npw'  | <b>No regulation by protons or water</b> is allowed.                                                                                                   |
|                            | 'npwe' | <b>No regulation by protons, water, or energy molecules</b> is allowed.                                                                                |

**Table 2:** Selected KOPTIC predictions agreeing with literature data on the thioredoxin enzyme regulation mechanism.

| Tissue | Enzyme                              | Enzyme Compartment | Regulator                | Regulation | Regulator Compartment | Error (% of maximum SSD) | Source(s)    |
|--------|-------------------------------------|--------------------|--------------------------|------------|-----------------------|--------------------------|--------------|
| Stem   | Pyruvate dehydrogenase E2 component | Cytosol            | Ferredoxin <sup>3+</sup> | Inhibition | Cytosol               | 2.28x10 <sup>-5</sup> %  | [35]         |
| Leaf   | Dihydroxy-acid dehydratase          | Cytosol            | Ferredoxin <sup>2+</sup> | Activation | Cytosol               | 0.17%                    | [35]         |
| Leaf   | Ketol-acid reductoisomerase         | Cytosol            | Ferredoxin <sup>2+</sup> | Activation | Cytosol               | 0.17%                    | [35]         |
| Stem   | Dihydrolipoamide Dehydrogenase      | Cytosol            | Ferredoxin <sup>3+</sup> | Inhibition | Cytosol               | 3.51%                    | [35]         |
| Seed   | Glucose-6-phosphate isomerase       | Plastid            | NADPH                    | Activation | Cytosol               | 3.66%                    | [35]         |
| Stem   | UDP-glucose phosphorylase           | Cytosol            | Ferredoxin <sup>3+</sup> | Inhibition | Cytosol               | 5.92%                    | [35]         |
| Stem   | Phosphogluco-mutase                 | Cytosol            | Ferredoxin <sup>3+</sup> | Inhibition | Cytosol               | 5.96%                    | [35]         |
| Stem   | Glucose-6-phosphate isomerase       | Cytosol            | NADP <sup>+</sup>        | Inhibition | Cytosol               | 7.74%                    | [35]         |
| Seed   | Pyruvate decarboxylase              | Cytosol            | NADPH                    | Activation | Cytosol               | 27.02%                   | [35]         |
| Seed   | Triosephosphate iosmerase           | Cytosol            | NADPH                    | Activation | Cytosol               | 30.63%                   | [35]         |
| Seed   | ATPase                              | Mitochondria       | Ferredoxin <sup>2+</sup> | Activation | Mitochondria          | 37.00%                   | [34][54][40] |

**Table 3:** Selected KOPTIC regulatory predictions corresponding to transcriptional regulation of enzymes by nitrogen or carbon signaling.

| Tissue | Enzyme (Gene)                                                                    | Enzyme Compartment | Regulator | Regulation | Regulator Compartment | Error (% of maximum SSD) | Source(s) |
|--------|----------------------------------------------------------------------------------|--------------------|-----------|------------|-----------------------|--------------------------|-----------|
| Seed   | Ribose-5-phosphate isomerase                                                     | Cytosol            | Phosphate | Inhibition | Cytosol               | 0.70%                    | [55]      |
| Seed   | 1,4-alpha-glucan branching enzyme                                                | Plastid            | Phosphate | Inhibition | Plastid               | 6.06%                    | [55]      |
| Stem   | Glucose-6-phosphate isomerase ( <i>at4G24620</i> )                               | Cytosol            | Sucrose   | Activation | Cytosol               | 6.61%                    | [46]      |
| Seed   | Fructose-bisphosphate aldose ( <i>at4G26530</i> )                                | Plastid            | Sucrose   | Inhibition | Extracellular         | 7.92%                    | [46]      |
| Leaf   | Fructose-1,6-bisphosphatase                                                      | Chloroplast        | Phosphate | Inhibition | Chloroplast           | 10.94%                   | [55]      |
| Seed   | Trehalose 6-phosphate phosphatase ( <i>at4G22590</i> )                           | Cytosol            | Sucrose   | Activation | Cytosol               | 12.34%                   | [46]      |
| Stem   | Phosphogulcomutase ( <i>at1G23190</i> )                                          | Cytosol            | Sucrose   | Activation | Extracellular         | 15.47%                   | [46]      |
| Seed   | 6-phosphofructokinase                                                            | Plastid            | Phosphate | Inhibition | Cytosol               | 15.92%                   | [55]      |
| Root   | 2,3-bisphosphoglycerate-independent phosphoglycerate mutase ( <i>at1G09780</i> ) | Cytosol            | Sucrose   | Activation | Cytosol               | 20.40%                   | [46]      |

**Table 4:** Correct predictions of citric acid cycle regulation enzyme regulation made by KOPTIC.

| Tissue | Enzyme (Gene)                | Enzyme Compartment | Regulator    | Regulation | Regulator Compartment | Error (% of maximum SSD) | Source(s) |
|--------|------------------------------|--------------------|--------------|------------|-----------------------|--------------------------|-----------|
| Stem   | 2-Oxoglutarate dehydrogenase | Inner Mitochondria | NADH         | Inhibition | Inner Mitochondria    | 5.14%                    | [56]      |
| Seed   | Succinate dehydrogenase      | Inner Mitochondria | Oxaloacetate | Inhibition | Outer Mitochondria    | 24.89%                   | [47]      |
| Seed   | Fumarase                     | Inner Mitochondria | Pyruvate     | Inhibition | Inner Mitochondria    | 37.79%                   | [56]      |
| Root   | Isocitrate dehydrogenase     | Inner Mitochondria | ATP          | Inhibition | Outer Mitochondria    | 38.63%                   | [47]      |
| Leaf   | Fumarase                     | Inner Mitochondria | Pyruvate     | Inhibition | Inner Mitochondria    | 78.72%                   | [47]      |

## FIG. LEGENDS

**Figure 1:** Workflow of the KOPTIC method. Much of this workflow is done by coding scripts. The brown boxes represent input data to KOPTIC, the green box represents the mixed integer non-linear programming (MINLP) optimization problem, and the pink boxes are the results obtained from solving the optimization problem. This workflow is repeated for each reaction (as KOPTIC solves on a per reaction basis). The collection of kinetic equations forms the basis a kinetic model of metabolism (kMM). Symbol definitions can be found in Supplemental File 1.

**Figure 2:** Statistical Analysis Graphs. A) Linear relationship between arabidopsis timeline fluxes and KOPTIC ‘reactomic’ flux predictions, including the squared Pearson’s correlation coefficient. B) Number of reactions returned by KOPTIC (number of reactions with any output) and number of fit kinetic equations returned by KOPTIC. Brackets and asterisks indicate statistically significant mean differences by the between-group ANOVA test. C) Shows the fit error of all KOPTIC predictions for each scenario type in terms of percent of maximum SSD. D) Shows the fit error of the best 75% of KOPTIC predictions, determined by percent of maximum SSD. E) Histogram of fit errors for all reactions fit by KOPTIC (counting multiple fits independently), along with the median and mean of all reactions fit. For A, B, and C, no comparison is made between location restriction scenarios (left) and identity restriction scenarios (right). \* Represents  $p < 0.05$ , \*\* represents  $p < 0.01$ , \*\*\* represents  $p < 0.001$ .

**Figure 3:** Kinetic Mechanisms. A) Mechanism of the thioredoxin enzyme regulation in *Arabidopsis*. The activation by reduced ferredoxin is reversible, and can activate the target enzyme by forming a complex with it or by reducing the disulfide bridges [31][35]. Figures B, C, D, and E are mechanisms used by KOPTIC for ‘reactomic’ predictions. B) A single-substrate irreversible enzyme reaction with activation. C) A reversible single-substrate irreversible enzyme reaction with inhibition. D) A dual-substrate reversible reaction with activation. E) A dual-substrate reversible reaction with inhibition



### Box Color Key

- Data from stoichiometric model of metabolism
- KOPTIC MINLP Problem
- KOPTIC Solution Data

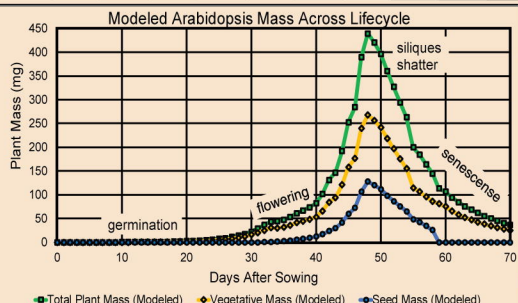

| Time              | 0.20 | 0.12 | 1.01 | ... | -0.01 | -0.5  |
|-------------------|------|------|------|-----|-------|-------|
| Reaction Velocity | 0.20 | 0.13 | 0.97 | ... | -0.02 | -0.25 |
| Time              | 0.20 | 0.14 | 0.90 | ... | -0.01 | 0.00  |
| Time              | 0.22 | 0.14 | 0.91 | ... | -0.02 | 0.10  |
| Time              | ...  | ...  | ...  | ... | ...   | ...   |
| Time              | 0.12 | 0.38 | 0.80 | ... | 0.00  | 0.11  |

  

| Time                     | 18.33 | 0.00 | 6.41 | ... | 0.19 | 5.51 |
|--------------------------|-------|------|------|-----|------|------|
| Metabolite Concentration | 22.07 | 0.00 | 7.23 | ... | 0.22 | 5.47 |
| Time                     | 19.56 | 0.10 | 8.24 | ... | 0.50 | 5.46 |
| Time                     | 19.86 | 0.14 | 5.77 | ... | 0.57 | 5.40 |
| Time                     | ...   | ...  | ...  | ... | ...  | ...  |
| Time                     | 4.41  | 0.38 | 1.31 | ... | 0.93 | 0.00 |

Reaction velocities at each timepoint

Determine metabolite pool size at each time point then convert to concentration using density and growth rate

2 Model Arabidopsis lifecycle to calculate metabolite concentration and reaction rate at each timepoint

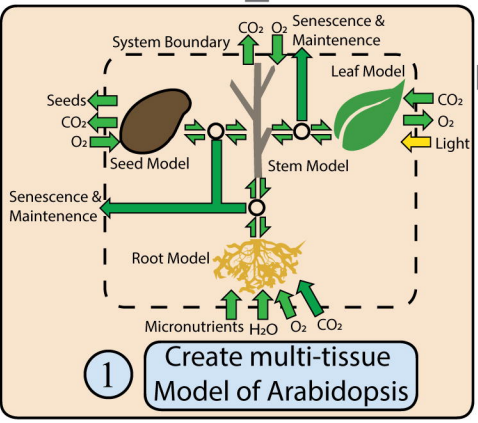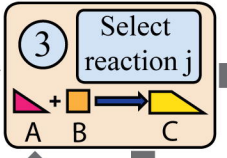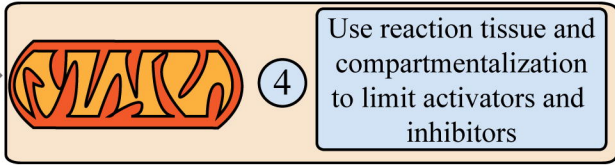

5 Set reaction type parameters

For each reaction  $j$

**Minimize** difference between input flux and kinetic flux prediction over all time points

*Subject to*

- Select best kinetic equation form
- Select at most one equation form
- Select at most one regulator
- Define at twelve kinetic equation forms
- Define variable bounds
- Ensure kinetic parameters are non-zero when used by the kinetic equation form selected
- Ensure kinetic parameters are zero when not used by the kinetic equation form selected

6 Define KOPTIC MINLP Problem using information from stoichiometric model

## KOPTIC Workflow

7 Solve KOPTIC problem using an MINLP solver

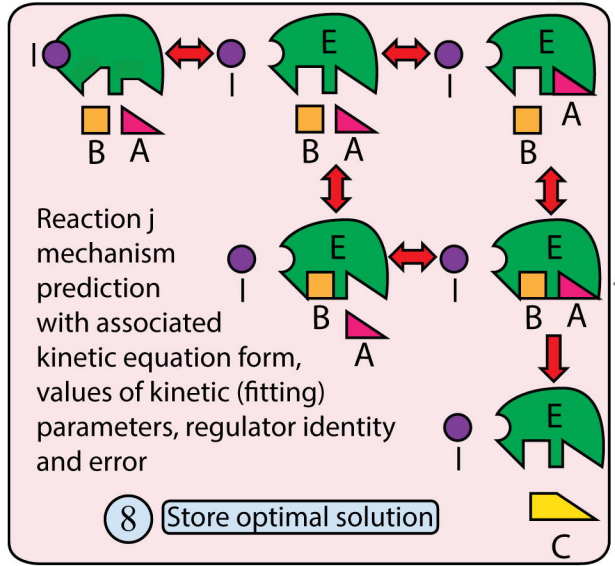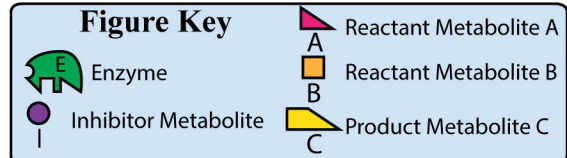

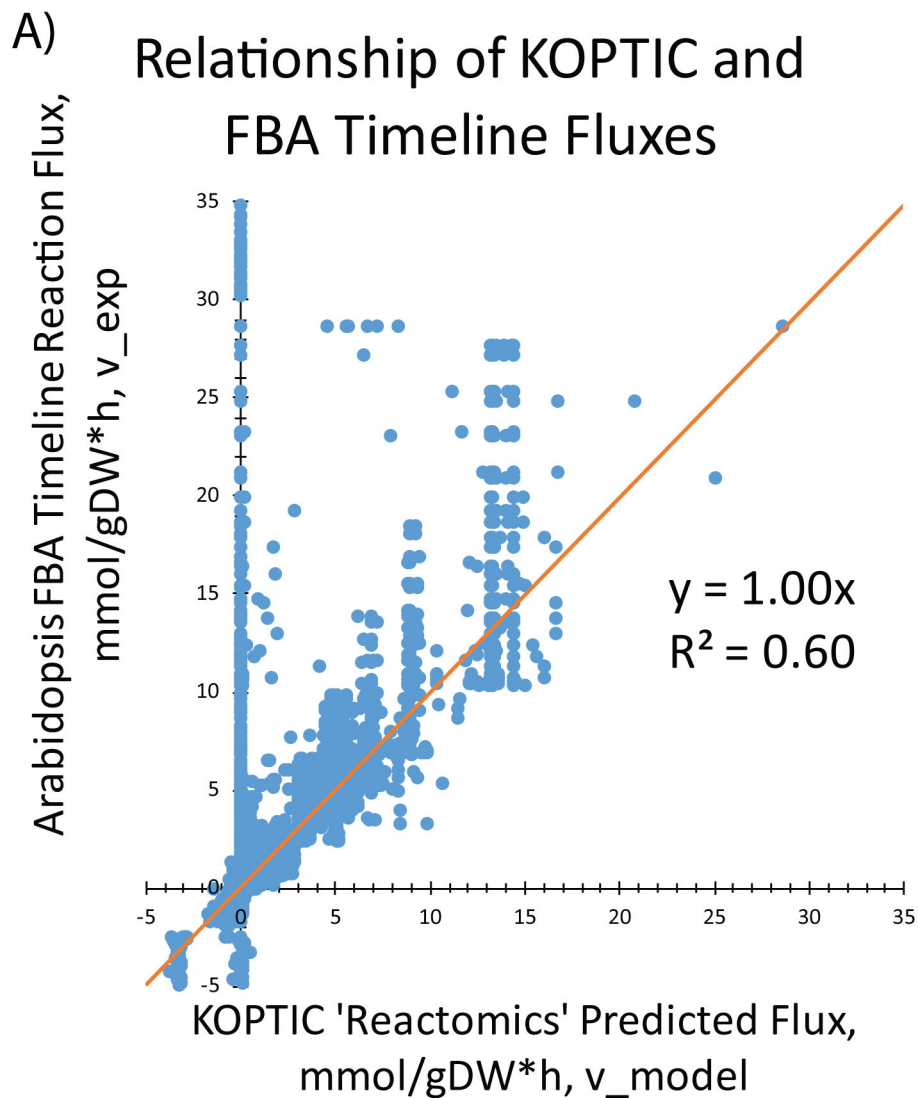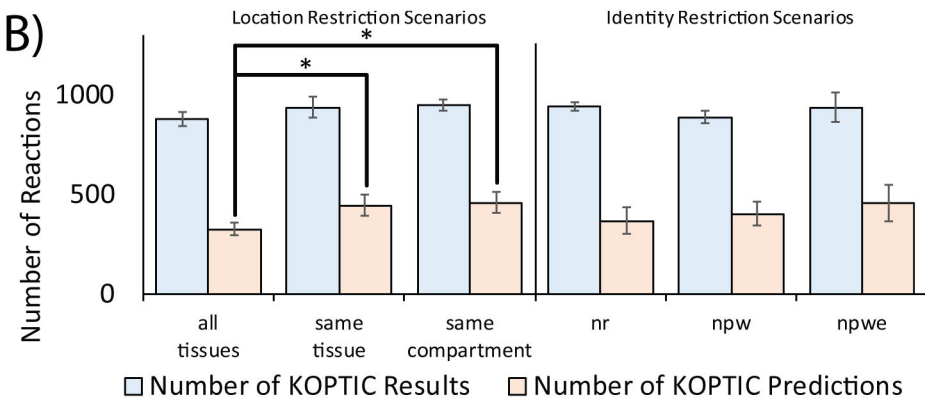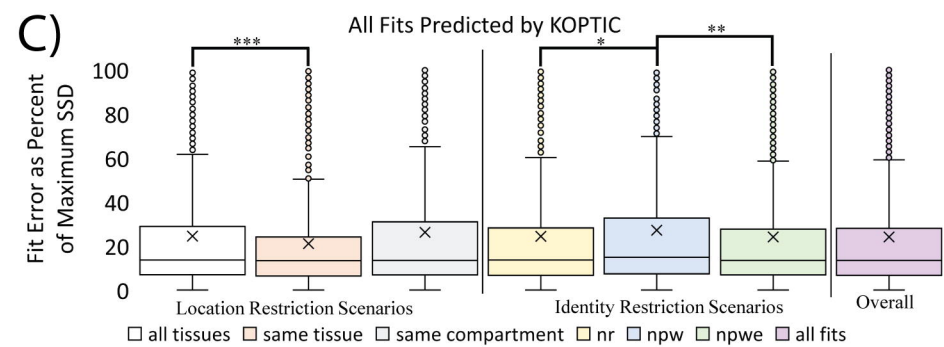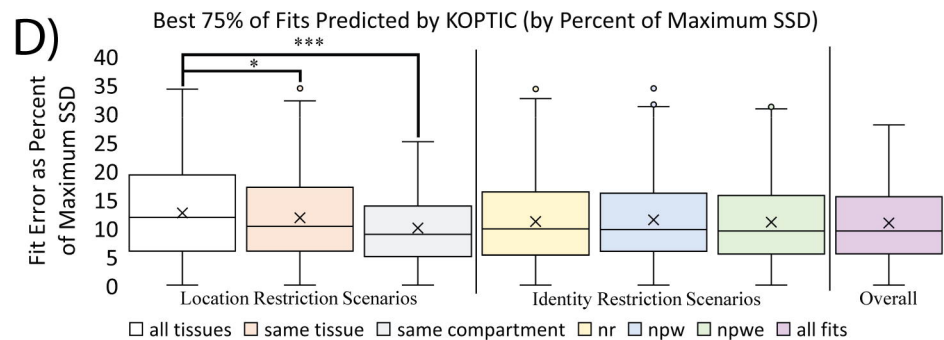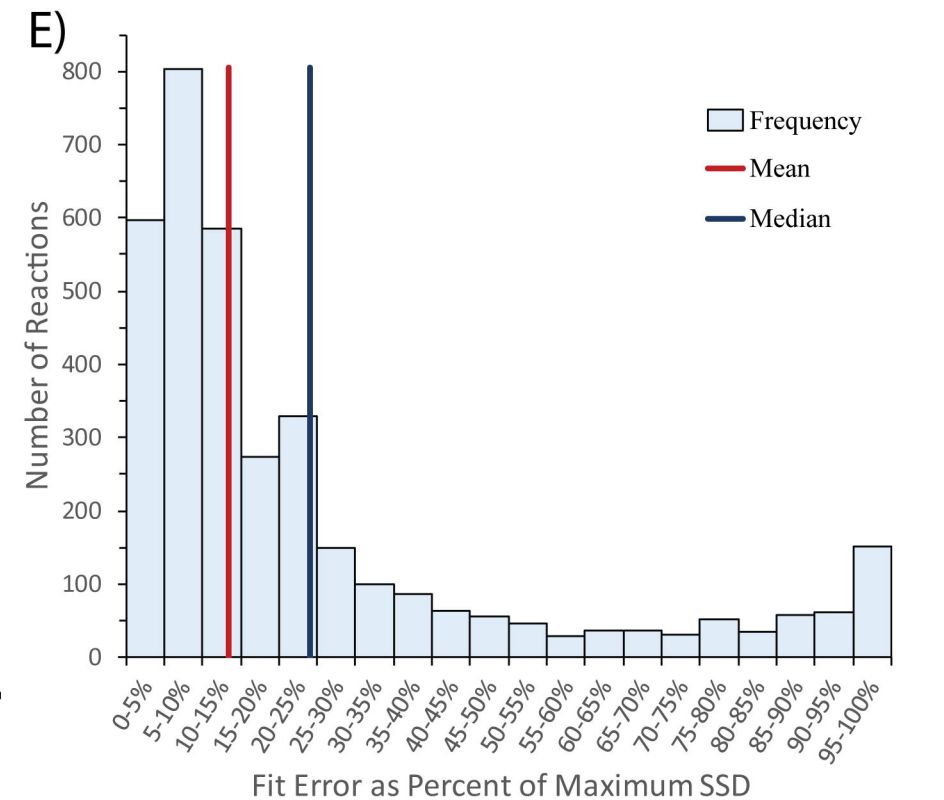

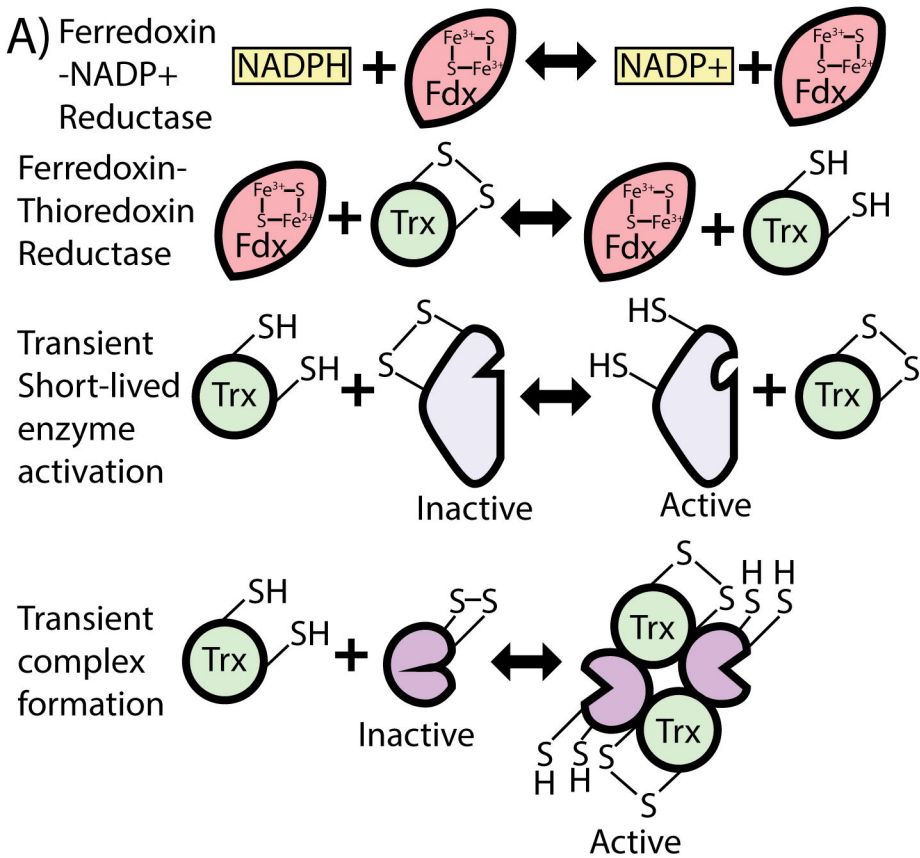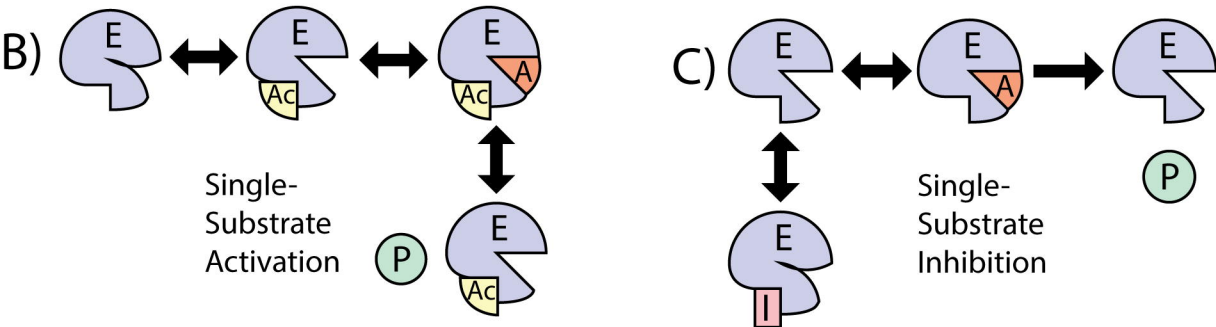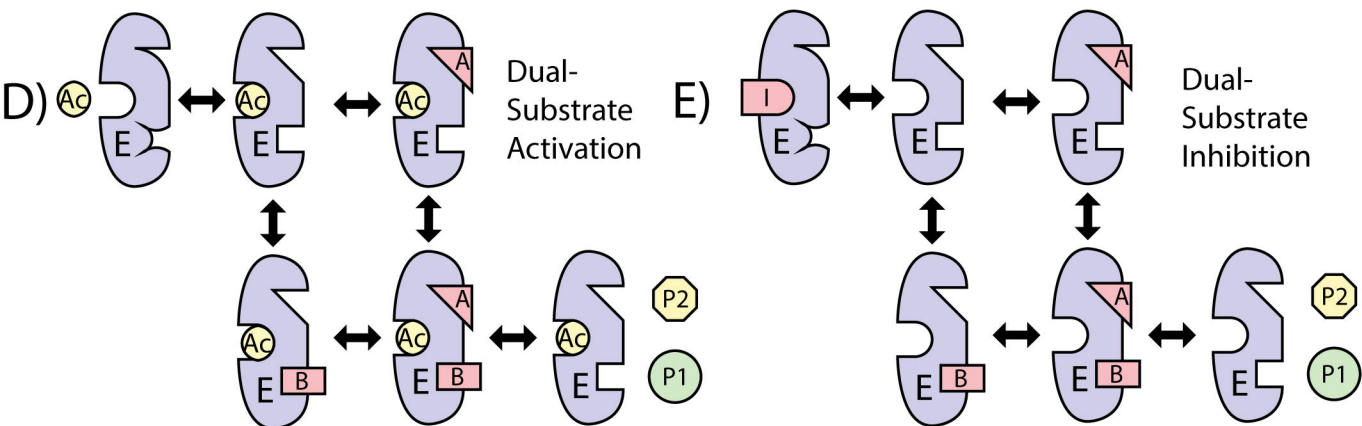

Source: https://www.biorxiv.org/content/10.1101/807628v1.full.pdf
